# Supplementary material
Source: PubMed Central journal article supplement (PMC10848897)
Supplement: NIHMS1963544-supplement-Supplemental_information.pdf [file NIHMS1963544-supplement-Supplemental_information.pdf]

Supporting information: Studying protein-ligand interactions by protein-denaturation and quantitative cross-linking mass spectrometry

Martin Mathay, Andrew Keller, and James E. Bruce\*

Department of Genome Sciences, University of Washington, Seattle, WA, USA

**Table S1 Intrinsic fluorescence raw values**

| wavelength (nm) | urea (M) | BSA     |         |         |         | BSA + Bilirubin |         |         |         |
|-----------------|----------|---------|---------|---------|---------|-----------------|---------|---------|---------|
|                 |          | read1   | read2   | read3   | read4   | read1           | read2   | read3   | read4   |
| 285,340         | blank    | 905542  | 929100  | 941877  | 954277  | 964577          | 974777  | 978515  | 982012  |
|                 | 0M       | 1872350 | 1913862 | 1917623 | 1943602 | 935371          | 953342  | 959569  | 957943  |
|                 | 1M       | 1848377 | 1901654 | 1911590 | 1912605 | 960342          | 970801  | 957962  | 968613  |
|                 | 2M       | 1853717 | 1887760 | 1900256 | 1909050 | 980559          | 968915  | 986866  | 986548  |
|                 | 4M       | 1623144 | 1660588 | 1636913 | 1609713 | 1045383         | 1046835 | 1035523 | 1036251 |
|                 | 5M       | 1443980 | 1469245 | 1486383 | 1484604 | 1086800         | 1088126 | 1076233 | 1081879 |
|                 | 6M       | 1367241 | 1382496 | 1384268 | 1383285 | 1125213         | 1124910 | 1113191 | 1103956 |
|                 | 8M       | 1171097 | 1189576 | 1194937 | 1198420 | 1056541         | 1064910 | 1057553 | 1049156 |
| 488,530         | blank    | 2414    | 2480    | 2606    | 2547    | 2578            | 2661    | 2674    | 2628    |
|                 | 0M       | 1826    | 1895    | 1903    | 1877    | 29072           | 29807   | 30167   | 30195   |
|                 | 1M       | 1838    | 1953    | 1966    | 1934    | 30792           | 31623   | 31678   | 31636   |
|                 | 2M       | 1879    | 2013    | 1965    | 1941    | 32797           | 33626   | 33395   | 33256   |
|                 | 4M       | 2032    | 2098    | 2064    | 2032    | 34756           | 34375   | 34129   | 33618   |
|                 | 5M       | 1992    | 2050    | 2068    | 2093    | 26903           | 27110   | 26886   | 27019   |
|                 | 6M       | 2034    | 2078    | 2129    | 2132    | 19219           | 19153   | 18954   | 18819   |
|                 | 8M       | 1950    | 1986    | 2077    | 2029    | 6123            | 6106    | 6098    | 6104    |

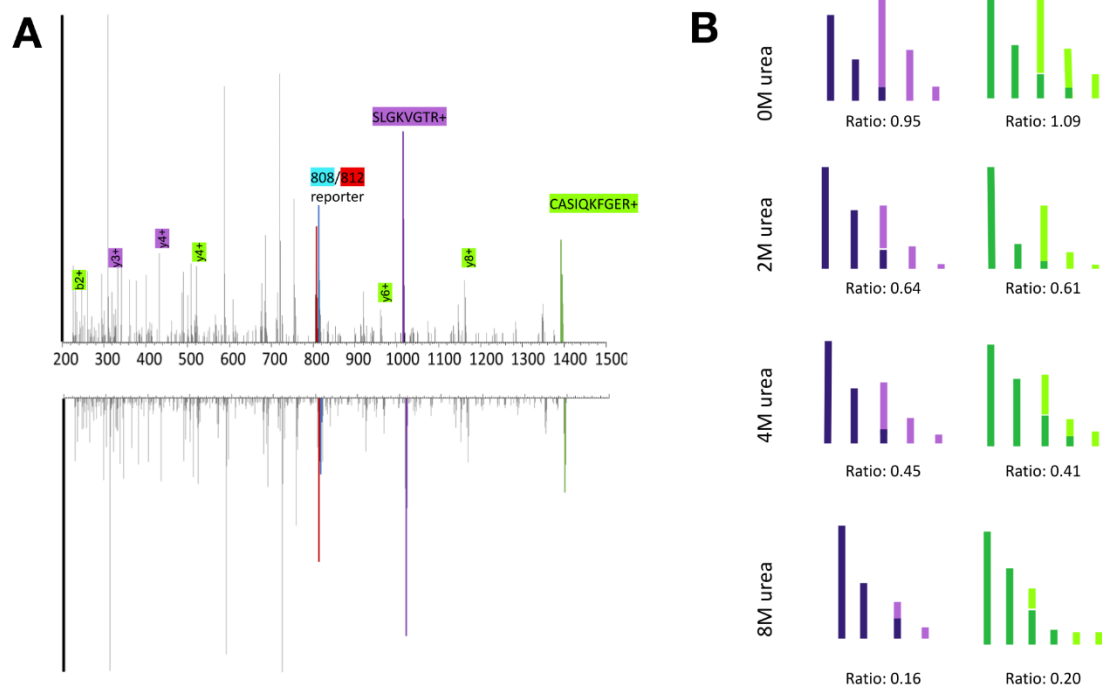

**Supplemental Figure S1 BSA crosslink spectra between reciprocally labeled experimental replicates.**

Example fragmentation and quantification spectrum of a BSA cross-linked peptide pair between reciprocally labeled experimental replicates. (A) Spectra of crosslink K228-K455 (CASIQK<sup>228</sup>FGER- SLGK<sup>455</sup>VGTR) in reciprocally labeled experiment 1 (top) and experiment 2 (bottom) displayed as mirror images. Peaks for reporter ions (iqPIR-808, red; iqPIR-812, blue), peptide CASIQK<sup>228</sup>FGER (green), and peptide SLGK<sup>455</sup>VGTR (purple), are highlighted. (B) Expanded views of released cross-linked peptide fragment ions illustrating the isotopic differences which are used for quantification. The resultant fragment ions differ by two <sup>13</sup>C and deconvoluted signal from iqPIR-812-reporter (darker) and iqPIR-808 (urea-exposed, lighter) are shown. Example released peptide signals come from 0M urea (experiment 2, injection 1, scan 7043), 2M (experiment 2, injection 1, scan 7112), 4M (experiment 1, injection 1, scan 6990), 8M (experiment 1, injection 1, scan 6895).

**A**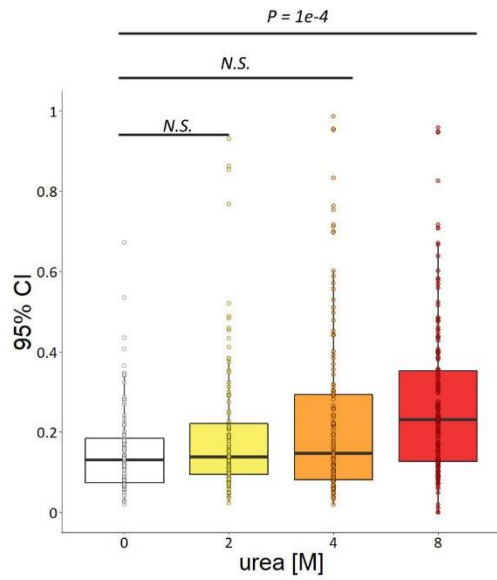**Supplemental Figure S2 Quantitation confidence does not decrease with urea exposure.**

The distribution of associated 95% confidence intervals for quantified cross-links (Fig 2B) were plotted with urea exposure. Errors were compared by paired Student's t-test with Bonferroni multiple test correction (N.S. = not significant, \*\*\*P<0.01). The median confidence interval between 0M and 8M urea exposure was 0.12 (B)

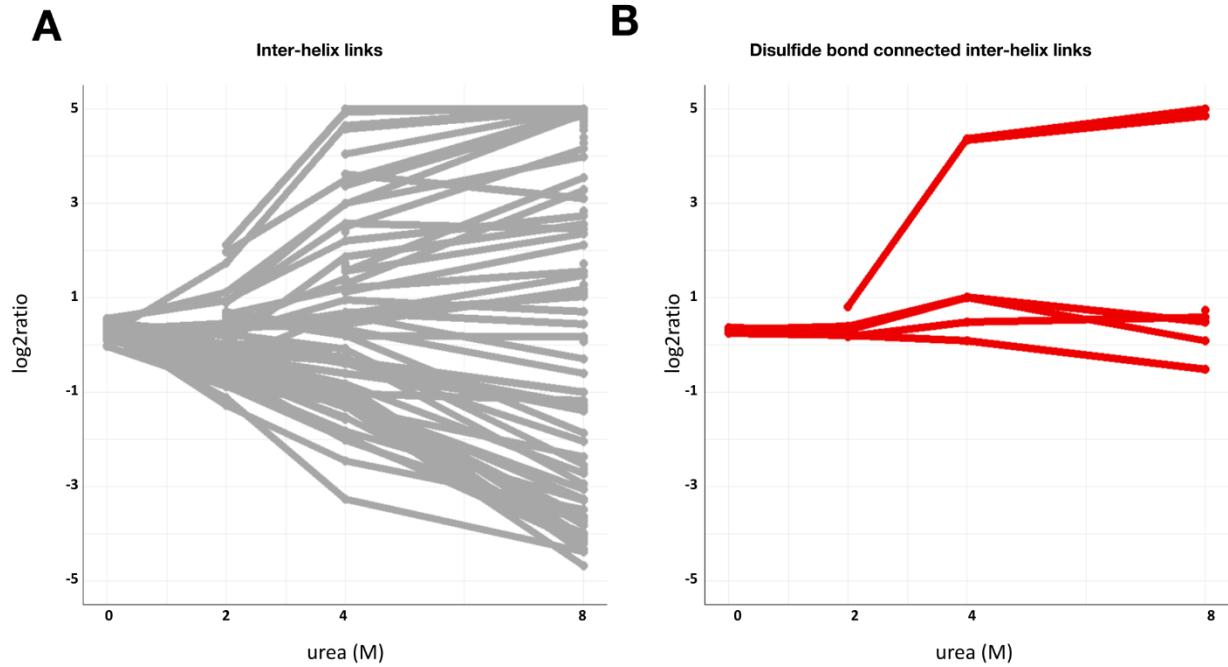

**Supplemental Figure S3. qXL-MS data obtained on cross-link peptide pairs of lysines on disulfide linked helices.**

(A) Urea concentration-dependent trends in cross-linked peptide pairs are identified by statistical filtering (3 of 4 concentrations quantified within a 95% confidence interval less than 1).  
 (B) The average log<sub>2</sub> values of cross-linked species mapped to helices connected by disulfide bonds are highlighted in red.

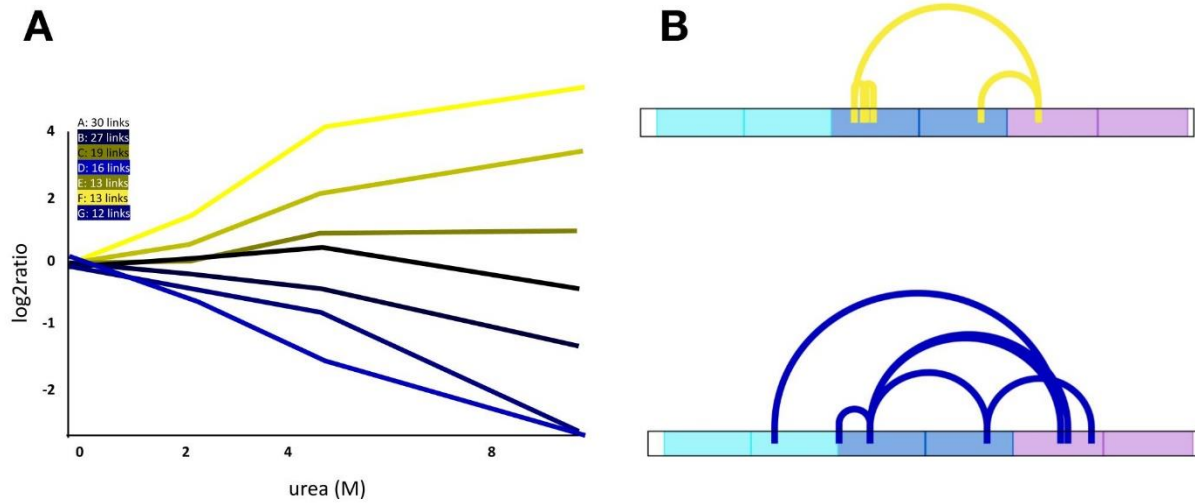

**Supplemental Figure S4. K-means analysis of BSA urea structural stability by MS2-based quantitative cross-linking.**

Urea concentration-dependent trends in cross-linked peptide pairs are identified by statistical filtering (3 of 4 concentrations quantified within a 95% confidence interval less than 1) and longitudinal k-means clustering. The average log<sub>2</sub> values and number of cross-linked species present in each cluster are given. (B) Domain level cross-link maps of clusters that showed the largest changes, generated with XiNet, illustrate inter- and intra- domain differences between the clusters.

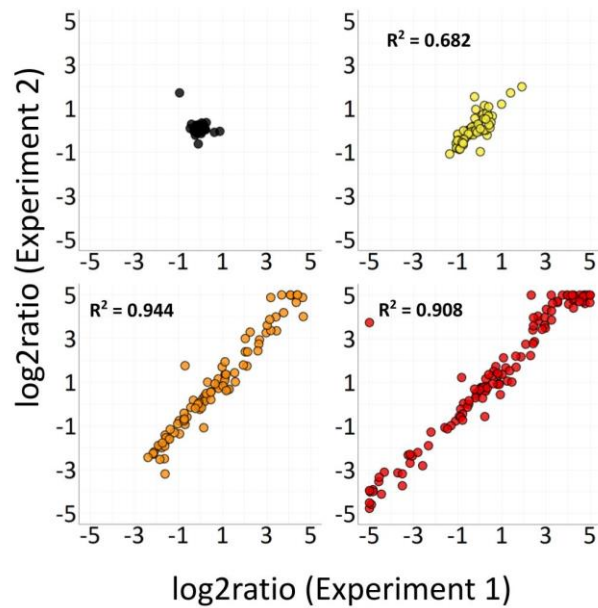

**Supplemental Figure S5. Reproducibility of reciprocal labeling in BSA-bilirubin experiments.**

Correlation of crosslink quantitation between two experimental replicates shown at 0M (black), 2M (yellow), 4M (orange), and 8M (red) urea exposure. Pearson's  $R^2$  values are given for each condition, indicating the reproducible observations of urea-induced unfolding and qXL-MS measurements. Cross-link quantification is available on XLinkDB as dataset inUrea\_BSA\_wBR\_fwd\_rev\_Bruce.

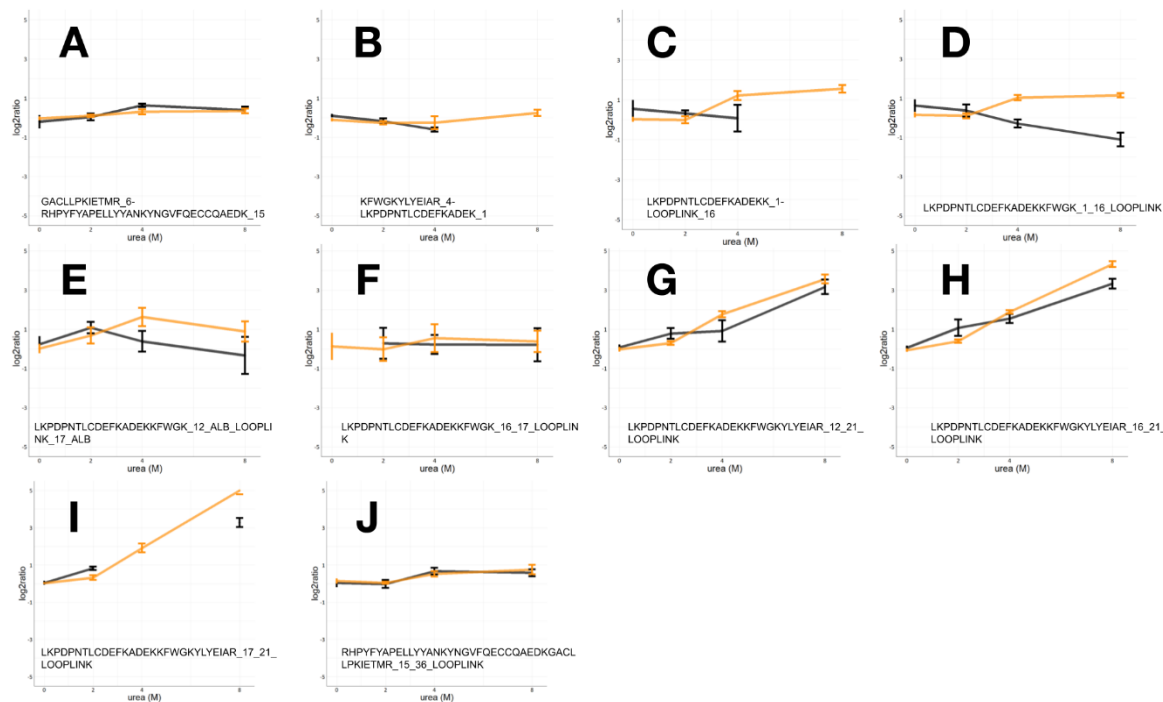

**Supplemental Figure S6. qXL-MS data obtained on cross-link peptide pairs of lysine residues in domain IB.**

(A-I) Shown are the relative log<sub>2</sub>ratios obtained for each peptide pairs at increasing urea concentrations for BSA (black) or BSA-bilirubin (orange). Error bars represent 95% quantitation confidence given all relevant calculated MS<sub>2</sub>-based ion pairs across experimental duplicate and technical triplicate. While many cross-linked peptide level changes are insensitive or unaltered by bilirubin interaction, cross-linked peptide K140-K155 (D) how increased urea-induced level changes in the presence of bilirubin. Thus, bilirubin binding with BSA appears to affect protein stability within the IB domain as indicated by qXL-MS.

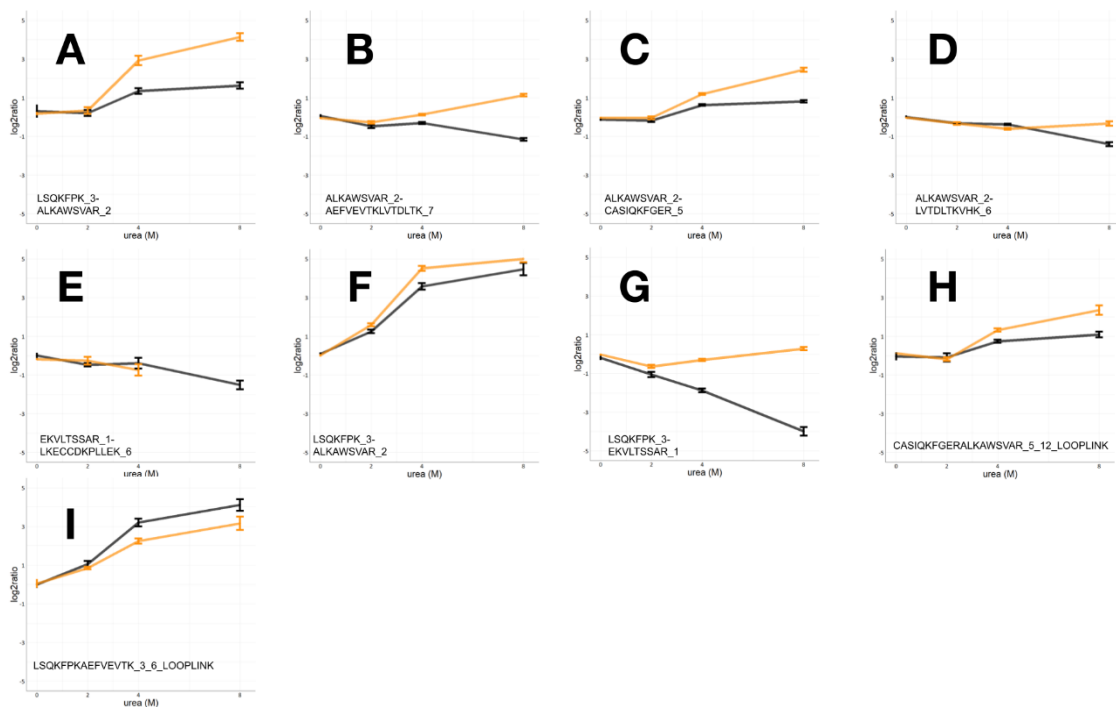

**Supplemental Figure S7. qXLMS data obtained on cross-link peptide pairs of lysines residues in domain IIA.**

(A-J) Shown are the relative log<sub>2</sub>ratios obtained for each peptide pairs at increasing urea concentrations for BSA (black) or BSA-bilirubin (orange). Error bars represent 95% quantitation confidence given all relevant calculated MS<sub>2</sub>-based ion pairs across experimental duplicate and technical triplicate.
